# Supplementary material for: Correction: LncRNA MYLK-AS1 facilitates tumor progression and angiogenesis by targeting miR-424-5p/E2F7 axis and activating VEGF R-2 signaling pathway in hepatocellular carcinoma
Source: PubMed Central journal article supplement (PMC10542228; doi:10.1186/s13046-023-02824-9), 2023-09-30
Supplement: 13046_2023_2824_MOESM1_ESM.pdf [file 13046_2023_2824_MOESM1_ESM.pdf]

**Table S1.** Primers and oligonucleotides sequences used in this study

| Name                     | Sequence 5'-3'                                                   |
|--------------------------|------------------------------------------------------------------|
| MYLK-AS1-forward         | GAATCCAGTGTTCGTCCGTGA                                            |
| MYLK-AS1-reverse         | AGGCAGATACCTGGCTTCCA                                             |
| MYLK-AS1-shRNA-1-forward | CCGGAGAATCCAGTGTTCGTCCGTGCTCGAGCAC<br>GGACGACACTGGATTCTTTTTTG    |
| MYLK-AS1-shRNA-1-reverse | AATTCAAAAAGAATCCAGTGTTCGTCCGTGCTC<br>GAGCACGGACGACACTGGATTCTCCGG |
| MYLK-AS1-shRNA-2-forward | CCGGGAGAGTGAGGTGCGGGATTGCTCGAGCA<br>ATCCCGCACCTCACTCTTTTTTG      |
| MYLK-AS1-shRNA-2-reverse | AATTCAAAAAGAGAGTGAGGTGCGGGATTGCT<br>CGAGCAATCCCGCACCTCACTCTCCCGG |
| MYLK-AS1-FISH probe      | CAGTGAGATTGGAAGCCAGGT                                            |
| E2F7-forward             | CTGCTGCGCTAGACTTGGATA                                            |
| E2F7-reverse             | AACCCTGGTCAGTGTAGGGC                                             |
| miR-424-5p-forward       | CGAGGGGATACAGCAGCAAT                                             |
| miR-424-5p -reverse      | TTCCCCACGAGGGGGTATAG                                             |
| U6 snRNA-forward         | AAAGCAAATCATCGGACGACC                                            |
| U6 snRNA-reverse         | GTACAACACATTGTTTCCTCGGA                                          |
| GAPDH-forward            | GAAAGCCTGCCGGTGAATA                                              |
| GAPDH-reverse            | TTCCCGTTCTCAGCCTTGAC                                             |
